# Supplementary material
Source: Springer Nature journal article supplement (https://www.springermedizin.de/resource/supplementary/12889_2011_3538_MOESM1_ESM.pdf/9489244)
Supplement: MOESM1 [file 9489244]

**Stage 1  
recruitment**

3290 Canadian adults who smoke 10 or more cigarettes per day, recruited through general population telephone survey and willing to participate in baseline, 8-week and 6-month surveys with saliva collection

Enrolment

*Not eligible for Stage 2 (n excluded):*  
Not interested in free NRT (n = 1250)  
Would not use NRT within a week to quit if it was sent to their home (n = 877)  
Health contraindications for NRT (n = 163)

**Stage 2  
randomization**

Randomized  
n = 1000

Allocation

*Experimental condition:* Offered free NRT; n = 500

*Control condition:* Not offered free NRT; n = 500

Follow-up

8-week fu  
*15% attrition*

8-week fu  
*15% attrition*

6-month fu  
*20% attrition*

6-month fu  
*20% attrition*
